# Supplementary material for: Effects of the COVID-19 pandemic on inpatient dermatosurgery in Germany: Retrospective evaluation of the surgical cases from nine dermatology clinics
Source: PubMed Central journal article supplement (PMC11538252; doi:10.1007/s00105-024-05417-5), 2024-10-10
Supplement: 105_2024_5417_MOESM1_ESM.pdf [file 105_2024_5417_MOESM1_ESM.pdf]

**Supplementary Information:** Online-Tabellen 1, 2 und 3

Online-Tabelle 1: Liste der an der Datenauswertung teilnehmenden Zentren (alphabetisch sortiert).

| Teilnehmende Klinik                                                                                       | Affiliation mit einer Universität        | Bundesland          |
|-----------------------------------------------------------------------------------------------------------|------------------------------------------|---------------------|
| Klinik für Dermatologie und Allergologie, Universitätsklinikum der RWTH Aachen, Aachen                    | Universitätsklinik                       | Nordrhein-Westfalen |
| Zentrum für Hauterkrankungen, Universitätsklinikum Bonn, Bonn                                             | Universitätsklinik                       | Nordrhein-Westfalen |
| Klinik für Dermatologie und Venerologie, HELIOS Klinikum Krefeld, Krefeld                                 | Lehrkrankenhaus einer Universitätsklinik | Nordrhein-Westfalen |
| Hautklinik, Klinikum Ludwigshafen am Rhein, Ludwigshafen                                                  | Lehrkrankenhaus einer Universitätsklinik | Rheinland-Pfalz     |
| Abteilung für Dermatochirurgie und Dermatologie, Artemed Fachklinik München, München                      | Keine Affiliation                        | Bayern              |
| Klinik und Poliklinik für Dermatologie und Allergologie, LMU München, München                             | Universitätsklinik                       | Bayern              |
| Klinik für Dermatologie, Venerologie und Allergologie, HELIOS St. Elisabeth Klinik Oberhausen, Oberhausen | Lehrkrankenhaus einer Universitätsklinik | Nordrhein-Westfalen |
| Hautklinik, Universitätsklinikum Tübingen, Tübingen                                                       | Universitätsklinik                       | Baden-Württemberg   |
| Zentrum für Dermatologie, Allergologie und Dermatochirurgie, HELIOS Universitätsklinikum Wuppertal        | Universitätsklinik                       | Nordrhein-Westfalen |

Online-Tabelle 2: Darstellung aller nach ICD-10 codierten dermatochirurgischen stationären Hauptdiagnosen in den teilnehmenden Kliniken, alphabetisch sortiert.

| ICD-10-Diagnoseschlüssel | Aufschlüsselung der Diagnose                    |
|--------------------------|-------------------------------------------------|
| A63.-                    | Anogenitale (venerische) Warzen                 |
| B07.-                    | Viruswarzen                                     |
| B08.-                    | Molluscum contagiosum                           |
| C00.-                    | Bösartige Neubildung der Lippe                  |
| C02.-                    | Bösartige Neubildung der Zunge                  |
| C03.-                    | Bösartige Neubildung vom Unterkieferzahnfleisch |

|       |                                                                                                           |
|-------|-----------------------------------------------------------------------------------------------------------|
| C21.- | Bösartige Neubildung des Anus                                                                             |
| C43.- | Bösartiges Melanom der Haut                                                                               |
| C44.- | Sonstige bösartige Neubildungen der Haut (wie Basalzellkarzinom, Plattenepithelkarzinom)                  |
| C46.- | Kaposi-Sarkom                                                                                             |
| C49.- | Bösartige Neubildung sonstigen Bindegewebes und anderer Weichteilgewebe (wie pleomorphes dermales Sarkom) |
| C50.- | Bösartige Neubildung der Mamma                                                                            |
| C51.- | Bösartige Neubildung der Vulva                                                                            |
| C60.- | Bösartige Neubildung des Penis                                                                            |
| C63.- | Bösartige Neubildung sonstiger und nicht näher bezeichneter männlicher Genitalorgane                      |
| C75.- | Bösartige Neubildung sonstiger endokriner Drüsen und verwandter Strukturen                                |
| C76.- | Bösartige Neubildung sonstiger und ungenau bezeichneter Lokalisationen                                    |
| C77.- | Sekundäre und nicht näher bezeichnete bösartige Neubildung der Lymphknoten                                |
| C79.- | Sekundäre bösartige Neubildung an sonstigen und nicht näher bezeichneten Lokalisationen                   |
| C80.- | Bösartige Neubildung ohne Angabe der Lokalisation                                                         |
| C82.- | Follikuläres Lymphom                                                                                      |
| C83.- | Nicht follikuläres Lymphom                                                                                |
| C84.- | Reifzellige T/NK-Zell-Lymphome                                                                            |
| C85.- | Sonstige und nicht näher bezeichnete Typen des Non-Hodgkin-Lymphoms                                       |
| C86.- | Weitere spezifizierte T/NK-Zell-Lymphome                                                                  |
| C97.- | Bösartige Neubildungen als Primärtumoren an mehreren Lokalisationen                                       |
| D03.- | Melanoma in situ                                                                                          |
| D04.- | Carcinoma in situ der Haut (beispielsweise Morbus Bowen)                                                  |
| D07.- | Carcinoma in situ der Genitalorgane                                                                       |
| D17.- | Gutartige Neubildung des Fettgewebes                                                                      |
| D18.- | Hämangiom und Lymphangiom                                                                                 |

|       |                                                                                                                                                          |
|-------|----------------------------------------------------------------------------------------------------------------------------------------------------------|
| D21.- | Sonstige gutartige Neubildungen des Bindegewebes und anderer Weichteilgewebe                                                                             |
| D22.- | Melanozytennävus                                                                                                                                         |
| D23.- | Sonstige gutartige Neubildung der Haut                                                                                                                   |
| D28.- | Gutartige Neubildungen der weiblichen Genitalorgane                                                                                                      |
| D29.- | Gutartige Neubildungen der männlichen Genitalorgane                                                                                                      |
| D36.- | Gutartige Neubildung an sonstigen und nicht näher bezeichneten Lokalisationen                                                                            |
| D48.- | Neubildung unsicheren oder unbekanntem Verhaltens an sonstigen und nicht näher bezeichneten Lokalisationen (beispielsweise auch atypisches Fibroxanthom) |
| H61.- | Sonstige Krankheiten des äußeren Ohres                                                                                                                   |
| I70.2 | Atherosklerose der Extremitätenarterien                                                                                                                  |
| I83.- | Varizen der unteren Extremitäten                                                                                                                         |
| I87.- | Sonstige Venenkrankheiten                                                                                                                                |
| K62.- | Sonstige Krankheiten des Anus und des Rektums                                                                                                            |
| L02.- | Hautabszess, Furunkel und Karbunkel                                                                                                                      |
| L03.- | Phlegmone                                                                                                                                                |
| L05.- | Pilonidalzyste                                                                                                                                           |
| L57.- | Hautveränderungen durch chronische Exposition gegenüber nichtionisierender Strahlung (aktinische Keratosen)                                              |
| L60.- | Krankheiten der Nägel                                                                                                                                    |
| L71.1 | Rhinophym                                                                                                                                                |
| L72.- | Follikuläre Zysten der Haut und der Unterhaut (beispielsweise Atherom oder Trichilemmalzyste)                                                            |
| L73.2 | Hidradenitis suppurativa                                                                                                                                 |
| L81.- | Sonstige Störungen der Hautpigmentierung                                                                                                                 |
| L82   | Seborrhoische Keratose                                                                                                                                   |
| L85.- | Sonstige Epidermisverdickung (inklusive Cornu cutaneum)                                                                                                  |
| L91.- | Hypertrophe Hautkrankheiten (inklusive hypertrophe Narben)                                                                                               |
| L97   | Ulcus cruris, anderenorts nicht klassifiziert                                                                                                            |
| L98.4 | Chronisches Ulkus der Haut, anderenorts nicht klassifiziert                                                                                              |
| L98.0 | Granuloma pediculatum (Granuloma pyogenicum)                                                                                                             |

|       |                                                                     |
|-------|---------------------------------------------------------------------|
| N47.- | Vorhauthypertrophie, Phimose und Paraphimose                        |
| N48.- | Sonstige Krankheiten des Penis                                      |
| N50.- | Sonstige Krankheiten der männlichen Genitalorgane                   |
| N75.- | Krankheiten der Bartholini-Drüsen                                   |
| N89.- | sonstige nichtentzündliche Krankheiten der Vagina                   |
| N90.- | sonstige nichtentzündlichen Krankheiten der Vulva und des Perineums |
| Q17.- | Sonstige angeborene Fehlbildungen des Ohres                         |
| Q27.- | Sonstige angeborene Fehlbildungen des peripheren Gefäßsystems       |
| Q82.- | Sonstige angeborene Fehlbildungen der Haut                          |
| Q85.- | Phakomatosen, anderenorts nicht klassifiziert                       |
| R23.- | Sonstige Hautveränderungen                                          |
| R61.- | Hyperhidrose                                                        |
| T81.- | Komplikationen bei Eingriffen, anderenorts nicht klassifiziert      |
| T86.5 | Versagen und Abstoßung eines Hauttransplantates                     |

Online-Tabelle 3: Darstellung der ausgewerteten Diagnosegruppen. Um die Datenauswertung übersichtlicher zu gestalten, wurden pathophysiologisch ähnliche Diagnosen oder Diagnosen an gleichen Lokalisationen zu Diagnosegruppen zusammengefasst. Die letzte Diagnosegruppe („Sonstiges“) beinhaltet alle seltenen stationären Diagnosen, die thematisch keiner anderen Gruppe zugeordnet werden konnten.

| <b>Zusammengefasste ICD-10-Diagnoseschlüssel</b> | <b>Resultierende Diagnosegruppen</b>                                                                                                          |
|--------------------------------------------------|-----------------------------------------------------------------------------------------------------------------------------------------------|
| C00.-/C02.-/C03.-                                | Bösartige Neubildungen der Lippen, Zunge oder Gingiva                                                                                         |
| C46.-/C49.-/C50.-/ C75.-/C76.-                   | Bösartige Neubildung des Bindegewebes (inklusive Kaposi-Sarkom und pleomorphes dermales Sarkom) jeder Lokalisation (außer Genitoanalbereichs) |
| C21.-/C51.-/C60.-/C63.-                          | Bösartige Neubildung des Genitoanalbereichs                                                                                                   |
| C77.-/C79.-/C80.-/C97.-                          | Sekundäre bösartige Neubildung jeder Lokalisation                                                                                             |
| C82.-/C83.-/C84.-/C85.-/C86.-                    | (Kutane) Lymphome                                                                                                                             |
| D04.-/D07.-                                      | Carcinoma in situ der Haut und Genitalorgane                                                                                                  |
| D17.-/D18.-/D21.-                                | Gutartige Neubildung des Bindegewebes                                                                                                         |

|                                               |                                                                               |
|-----------------------------------------------|-------------------------------------------------------------------------------|
| D23.-/D28.-/D29.-/D36.-                       | Gutartige Neubildungen der Haut und sonstigen Lokalisationen                  |
| I70.2/I83.-/I87.-/L97/L98.4                   | Chronisches Ulkus der Haut (inklusive Ulcus cruris) unabhängig von der Genese |
| L02.-/L03.-                                   | Hautabszess, Furunkel, Karbunkel oder Phlegmone                               |
| N47.-/N48.-/N50.-                             | Sonstige Krankheiten der männlichen Genitalorgane                             |
| N75.-/N89.-/N90.-                             | Sonstige Krankheiten der weiblichen Genitalorgane                             |
| Q17.-/Q27.-/Q82.-/Q85.-                       | Sonstige angeborene Fehlbildungen der Haut und Gefäße                         |
| T81.-/T86.5                                   | Komplikationen bei Eingriffen                                                 |
| H61.-/R23.-/L81.-/L82/ L85.-<br>/L91.-/ L98.0 | Sonstiges                                                                     |
